# Supplementary material
Source: MDPI journal article supplement (https://www.mdpi.com/2227-9717/12/2/317)
Supplement: s1 [file s1]

## Supplementary Materials

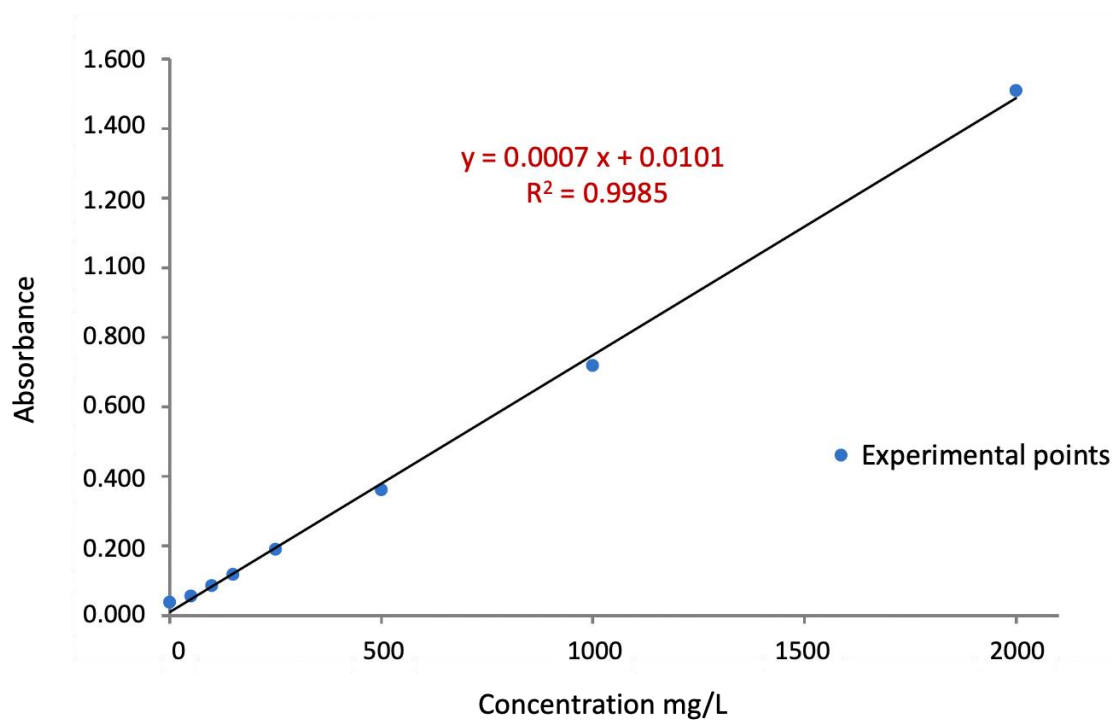

**Figure S1.** Gallic acid standard curve Folin-Ciocalteu method ( $\lambda = 765$  nm).

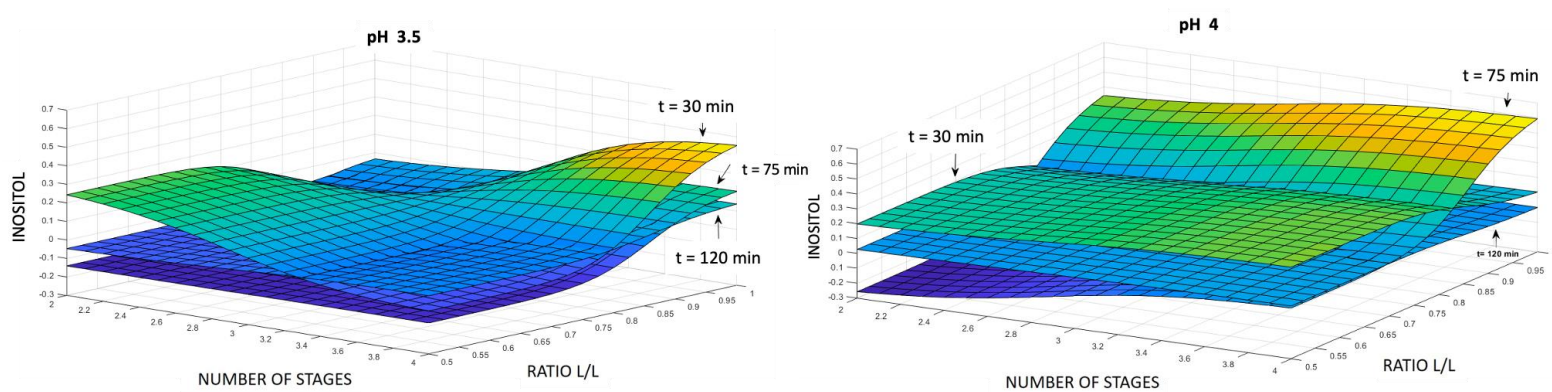

**Figure S2.** Surface plot of inositol extractions at pH of 3.5 (left) and 4 (right) as a function of the studied variables.

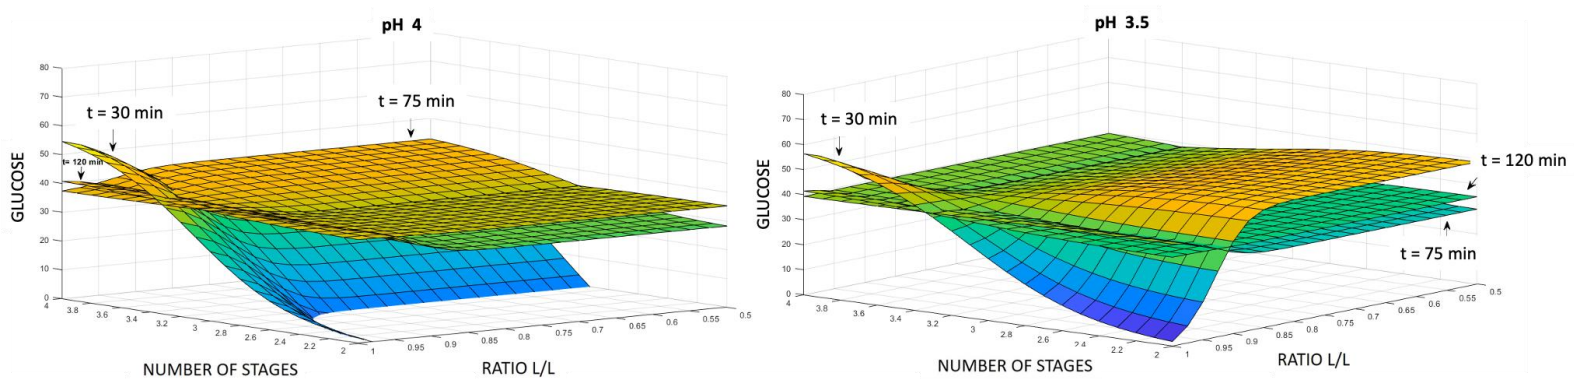

**Figure S3.** Surface plot of glucose extractions at pH of 4 (left) and 3.5 (right) as a function of the studied variables.

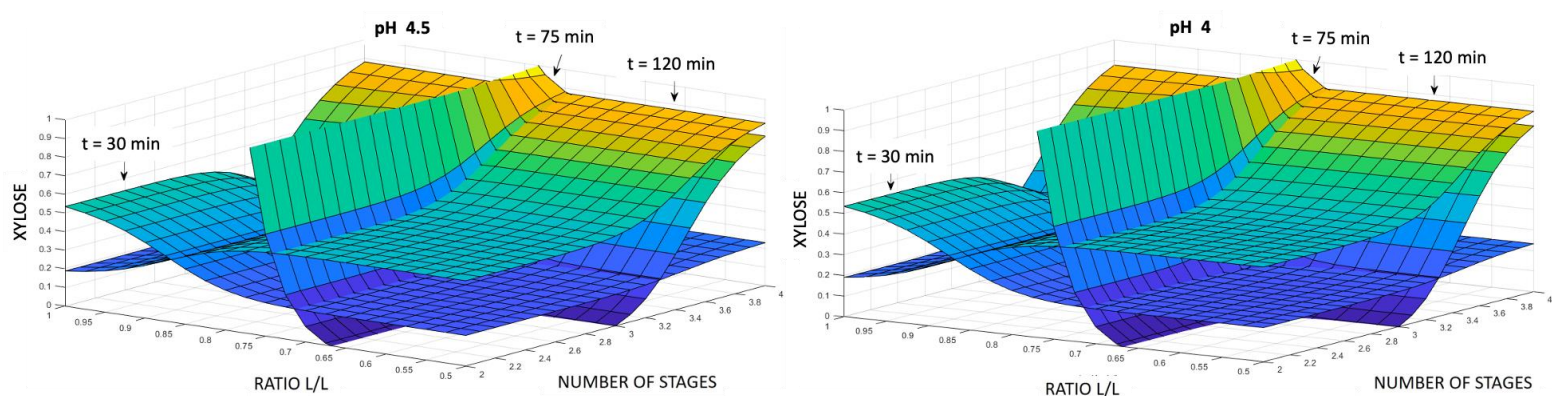

**Figure S4.** Surface plot of xylose extractions at pH of 4.5 (left) and 4 (right) as a function of the studied variables.

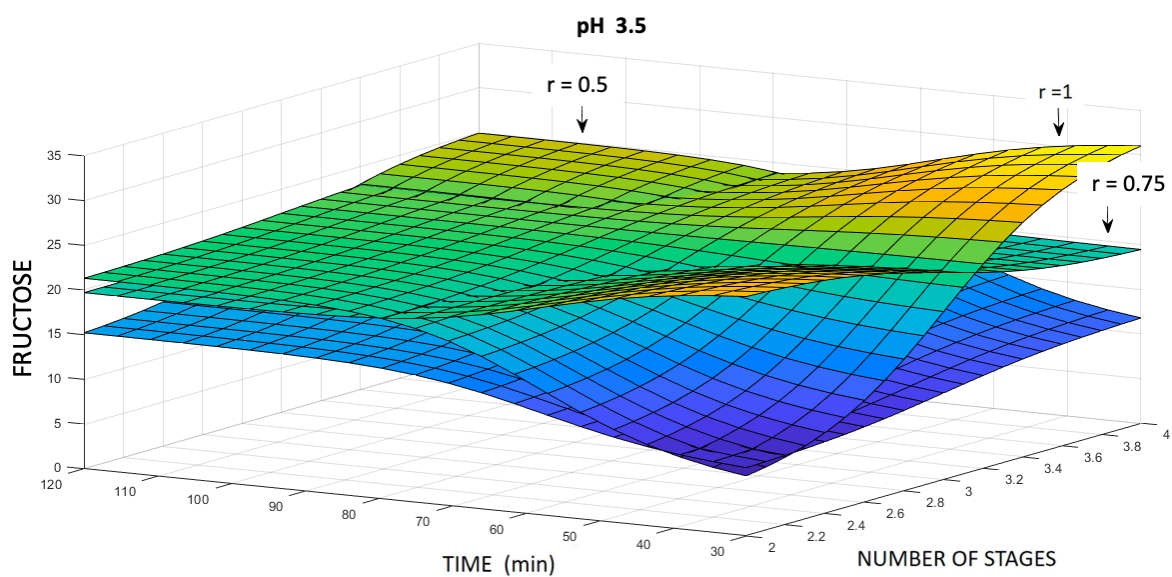

**Figure S5.** Surface plot of fructose extractions at pH of 3.5 as a function of the studied variables.

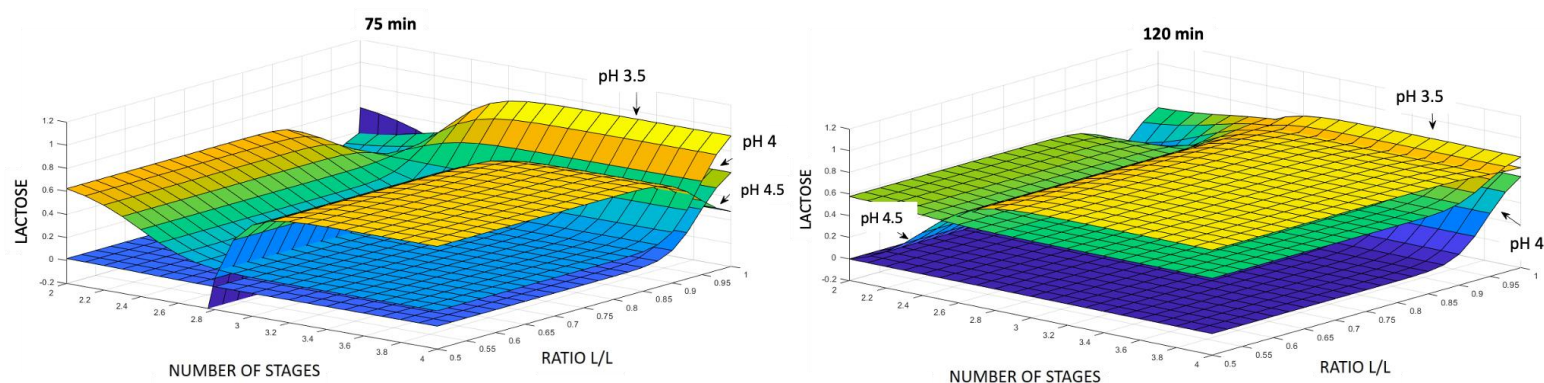

**Figure S6.** Surface plot of lactose extractions for 75 min (left) and 120 min (right) as a function of the studied variables.

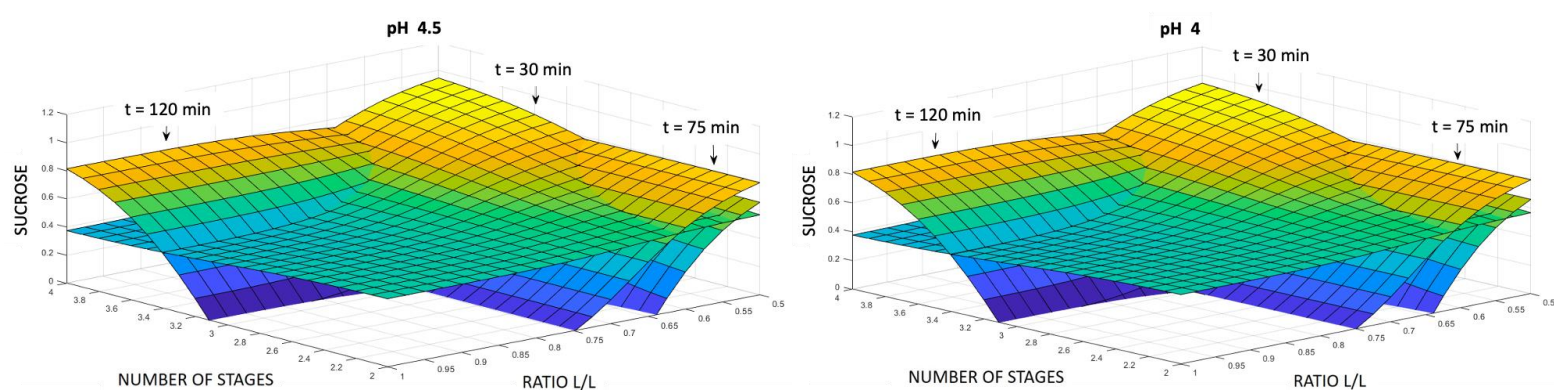

**Figure S7.** Surface plot of sucrose extractions at pH of 4.5 (left) and 4 (right) as a function of the studied variables.

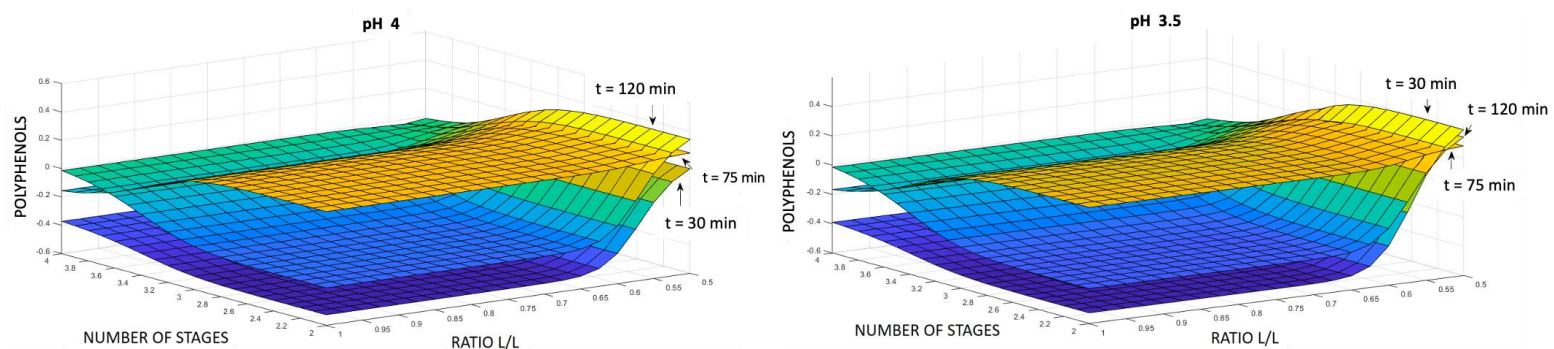

**Figure S8.** Surface plot of polyphenols extractions at pH of 4 (left) and 3.5 (right) as a function of the studied variables.



**Table S1.** Experimental results for the optimization of the xylose extraction process, parameters, constants, and the ANFIS model fit.

| Exp.      | Xylose<br>mg/L | Relative<br>increase | Estimation<br>ANFIS | % Error                                     | Exp.        | Xylose<br>mg/L | Relative<br>increase                                                                  | Estimation<br>ANFIS | % Error |
|-----------|----------------|----------------------|---------------------|---------------------------------------------|-------------|----------------|---------------------------------------------------------------------------------------|---------------------|---------|
| 1         | 205.4          | 0.53                 | 0.53                | 0.03                                        | 16          | 222.1          | 0.58                                                                                  | 0.55                | 5.42    |
| 2         | 190.4          | 0.49                 | 0.49                | 0.05                                        | 18          | 335.9          | 0.87                                                                                  | 0.87                | 0.04    |
| 3         | 60.94          | 0.16                 | 0.18                | 14.73                                       | 19          | 336.4          | 0.87                                                                                  | 0.87                | 0.04    |
| 4         | 89.53          | 0.23                 | 0.23                | 0.64                                        | 20          | 184.3          | 0.48                                                                                  | 0.47                | 1.19    |
| 5         | 313.5          | 0.82                 | 0.81                | 0.10                                        | 21          | 174.9          | 0.45                                                                                  | 0.46                | 1.04    |
| 6         | 115.1          | 0.30                 | 0.30                | 0.63                                        | 22          | 154.7          | 0.40                                                                                  | 0.40                | 0.19    |
| 7         | 0.00           | 0.00                 | 0.00                | -                                           | 23          | 100.6          | 0.26                                                                                  | 0.26                | 0.23    |
| 8         | 72.18          | 0.19                 | 0.17                | 11.50                                       | 24          | 338.2          | 0.88                                                                                  | 0.88                | 0.04    |
| 9         | 124.5          | 0.32                 | 0.32                | 0.13                                        | 25          | 72.26          | 0.19                                                                                  | 0.19                | 0.05    |
| 12        | 0.00           | 0.00                 | 0.00                | -                                           | 26          | 384.6          | 1.00                                                                                  | 1.00                | 0.02    |
| 13        | 0.00           | 0.00                 | 0.00                | -                                           | 10* 17* 27* | 181.1          | 0.47                                                                                  | 0.57                | 19.98   |
| 15        | 339.4          | 0.88                 | 0.88                | 0.35                                        |             |                |                                                                                       |                     |         |
| Constants |                |                      |                     | Variables                                   |             | Value L        | Molecule                                                                              |                     |         |
| a1        | 0.385          | a13                  | 0.15                | t (min)                                     | 30          | 19.1097        | 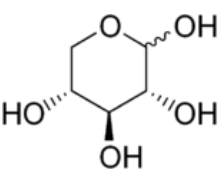 |                     |         |
| a2        | 0.182          | a14                  | 21.138              |                                             | 75          | 19.1097        |                                                                                       |                     |         |
| a3        | 1.049          | a15                  | 0.011               |                                             | 120         | 19.1097        |                                                                                       |                     |         |
| a4        | 0.195          | a16                  | 1.191               | r                                           | 0.5         | 0.2266         |                                                                                       |                     |         |
| a5        | 0.528          | a17                  | 0.428               |                                             | 1           | 0.1124         |                                                                                       |                     |         |
| a6        | -0.702         | a18                  | 0.494               | e                                           | 2           | 0.9211         |                                                                                       |                     |         |
| a7        | 0.258          | a19                  | 0.993               |                                             | 4           | 0.4746         |                                                                                       |                     |         |
| a8        | -0.197         | a20                  | 0.928               | p                                           | 3.5         | 0.176          |                                                                                       |                     |         |
| a9        | -0.194         | a21                  | 1.308               |                                             | 4.5         | 0.4623         |                                                                                       |                     |         |
| a10       | -0.095         | a22                  | -1.159              | Coefficient of determination R <sup>2</sup> |             |                |                                                                                       |                     |         |
| a11       | 0.116          | a23                  | -0.112              | 0.993                                       |             |                |                                                                                       |                     |         |
| a12       | 0.966          | a24                  | 0.967               |                                             |             |                |                                                                                       |                     |         |

\*central points

**Table S2.** Experimental results for the optimization of the fructose extraction process, parameters, constants, and the ANFIS model fit.

| Exp. | Fructose<br>mg/L | Relative<br>value | Estimation<br>ANFIS | % Error | Exp. | Fructose<br>mg/L | Relative<br>value | Estimation<br>ANFIS | % Error |
|------|------------------|-------------------|---------------------|---------|------|------------------|-------------------|---------------------|---------|
| 1    | 1590             | 7.56              | 7.57                | 0.02    | 15   | 4499             | 23.23             | 23.18               | 0.20    |
| 2    | 1433             | 6.72              | 6.73                | 0.18    | 16   | 3118             | 15.79             | 15.74               | 0.35    |
| 3    | 1870             | 9.07              | 9.09                | 0.24    | 18   | 4196             | 21.60             | 21.58               | 0.10    |
| 4    | 5614             | 29.24             | 29.25               | 0.06    | 19   | 3897             | 19.99             | 19.94               | 0.23    |
| 5    | 3795             | 19.44             | 19.43               | 0.04    | 20   | 4033             | 20.72             | 20.93               | 1.03    |
| 6    | 5942             | 31.00             | 31.02               | 0.06    | 21   | 4111             | 21.14             | 21.12               | 0.12    |
| 7    | 4280             | 22.05             | 22.05               | 0.02    | 22   | 3853             | 19.75             | 19.70               | 0.24    |
| 8    | 933.4            | 4.03              | 4.00                | 0.56    | 23   | 4485             | 23.15             | 23.23               | 0.34    |
| 9    | 5162             | 26.80             | 26.81               | 0.03    | 24   | 3863             | 19.81             | 19.85               | 0.23    |
| 11   | 4001             | 20.55             | 20.71               | 0.80    | 25   | 4265             | 21.97             | 22.02               | 0.22    |

| 12        | 3612    | 18.45 | 18.73     | 1.51                            | 26             | 4128    | 21.23                                                                               | 21.31 | 0.39 |  |  |  |
|-----------|---------|-------|-----------|---------------------------------|----------------|---------|-------------------------------------------------------------------------------------|-------|------|--|--|--|
| 13        | 3776    | 19.33 | 19.49     | 0.81                            | 10* 17*<br>27* | 3903    | 20.02                                                                               | 19.42 | 2.99 |  |  |  |
| 14        | 4181    | 21.52 | 21.23     | 1.31                            |                |         |                                                                                     |       |      |  |  |  |
| Constants |         |       | Variables |                                 | Value L        |         | Molecule                                                                            |       |      |  |  |  |
| a1        | 28.639  | a13   | 19.682    | t (min)                         | 30             | 24.1904 | 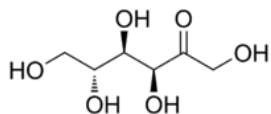 |       |      |  |  |  |
| a2        | -50.561 | a14   | 21.163    |                                 | 120            | 41.2922 |                                                                                     |       |      |  |  |  |
| a3        | 18.877  | a15   | 19.943    |                                 | 0.5            | 0.0842  |                                                                                     |       |      |  |  |  |
| a4        | 34.156  | a16   | 21.654    | r                               | 0.75           | 0.0588  |                                                                                     |       |      |  |  |  |
| a5        | 6.628   | a17   | 14.117    | e                               | 1              | 0.113   |                                                                                     |       |      |  |  |  |
| a6        | 5.095   | a18   | 19.898    |                                 | 2              | 0.8075  |                                                                                     |       |      |  |  |  |
| a7        | 7.989   | a19   | 25.602    |                                 | 4              | 0.7942  |                                                                                     |       |      |  |  |  |
| a8        | 5.797   | a20   | 25.792    | p                               | 3.5            | 0.3775  |                                                                                     |       |      |  |  |  |
| a9        | 3.728   | a21   | 21.23     |                                 | 4.5            | 0.3444  |                                                                                     |       |      |  |  |  |
| a10       | 5.075   | a22   | 22.141    | Coefficient of determination R² |                |         |                                                                                     |       |      |  |  |  |
| a11       | 33.322  | a23   | 23.341    | 0.999                           |                |         |                                                                                     |       |      |  |  |  |
| a12       | 22.717  | a24   | 19.621    |                                 |                |         |                                                                                     |       |      |  |  |  |

\*Central points

\*Central points

**Table S3.** Experimental results for the optimization of the lactose extraction process, parameters, constants, and the ANFIS model fit.

| Exp.      | Lactose mg/L | Relative increase | Estimation ANFIS | % Error | Exp.        | Lactose mg/L | Relative increase                                                                     | Estimation ANFIS | % Error |
|-----------|--------------|-------------------|------------------|---------|-------------|--------------|---------------------------------------------------------------------------------------|------------------|---------|
| 1         | 98.5         | 0.60              | 0.62             | 4.08    | 15          | 0.00         | 0.00                                                                                  | 0.00             | -       |
| 2         | 0.00         | 0.00              | 0.00             | -       | 16          | 0.00         | 0.00                                                                                  | 0.02             | -       |
| 4         | 106          | 0.65              | 0.63             | 1.93    | 18          | 128          | 0.78                                                                                  | 0.77             | 0.63    |
| 5         | 0.00         | 0.00              | -0.14            | -       | 19          | 101          | 0.61                                                                                  | 0.51             | 16.8    |
| 6         | 165          | 1.00              | 1.01             | 1.01    | 20          | 0.00         | 0.00                                                                                  | 0.00             | -       |
| 7         | 0.00         | 0.00              | -0.04            | -       | 21          | 0.00         | 0.00                                                                                  | 0.00             | -       |
| 8         | 0.00         | 0.00              | 0.03             | -       | 22          | 95.1         | 0.58                                                                                  | 0.58             | 0.12    |
| 9         | 108          | 0.65              | 0.66             | 0.30    | 23          | 136          | 0.82                                                                                  | 0.82             | 0.07    |
| 11        | 100          | 0.61              | 0.59             | 3.28    | 24          | 119          | 0.72                                                                                  | 0.72             | 0.06    |
| 12        | 0.00         | 0.00              | 0.14             | -       | 25          | 96.6         | 0.59                                                                                  | 0.59             | 0.09    |
| 13        | 0.00         | 0.00              | 0.00             | -       | 26          | 0.00         | 0.00                                                                                  | 0.00             | -       |
| 14        | 102          | 0.62              | 0.61             | 0.67    | 10* 17* 27* | 0.00         | 0.00                                                                                  | 0.00             | -       |
| Constants |              |                   | Variables        |         | Value L     |              | Molecule                                                                              |                  |         |
| a1        | 0.731        | a13               | 0.616            | t (min) | 30          | 38.2268      | 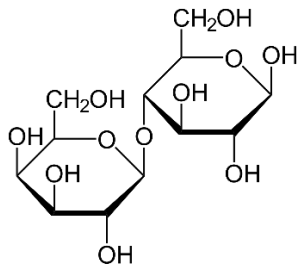 |                  |         |
| a2        | 1.728        | a14               | -0.141           |         | 120         | 38.2121      |                                                                                       |                  |         |
| a3        | -28.766      | a15               | 1.665            |         | 0.5         | 0.2294       |                                                                                       |                  |         |
| a4        | -0.15        | a16               | 0.588            | r       | 1           | 0.0676       |                                                                                       |                  |         |
| a5        | -0.031       | a17               | -0.087           |         | 2           | 0.3829       |                                                                                       |                  |         |
| a6        | 0.668        | a18               | 0.828            | e       | 4           | 0.9221       |                                                                                       |                  |         |
| a7        | -0.419       | a19               | -0.305           |         | 3.5         | 0.2123       |                                                                                       |                  |         |
| a8        | 0.391        | a20               | 0.005            | p       | 4           | 0.2086       |                                                                                       |                  |         |
| a9        | 7.393        | a21               | 0.343            |         | 4.5         | 0.2119       |                                                                                       |                  |         |

|     |        |     |       |                                                      |
|-----|--------|-----|-------|------------------------------------------------------|
| a10 | 1.303  | a22 | 0.874 | Coefficient of determination R <sup>2</sup><br>0.983 |
| a11 | 0.754  | a23 | 0.785 |                                                      |
| a12 | -0.255 | a24 | 0.767 |                                                      |

\*Central points

**Table S4.** Experimental results for the optimization of the sucrose extraction process, parameters, constants, and the ANFIS model fit.

| Exp.      | Sucrose mg/L | Relative increase | Estimation ANFIS | % Error                                              | Exp.        | Sucrose mg/L | Relative increase                                                                     | Estimation ANFIS | % Error |
|-----------|--------------|-------------------|------------------|------------------------------------------------------|-------------|--------------|---------------------------------------------------------------------------------------|------------------|---------|
| 1         | 120.2        | 0.49              | 0.49             | 0.18                                                 | 15          | 0.00         | 0.00                                                                                  | 0.00             | -       |
| 2         | 82.23        | 0.33              | 0.33             | 0.12                                                 | 16          | 0.00         | 0.00                                                                                  | 0.00             | -       |
| 3         | 121.7        | 0.49              | 0.49             | 0.24                                                 | 18          | 171.4        | 0.69                                                                                  | 0.69             | 0.10    |
| 4         | 234.1        | 0.95              | 0.95             | 0.05                                                 | 19          | 81.99        | 0.33                                                                                  | 0.33             | 0.19    |
| 5         | 183.0        | 0.74              | 0.74             | 0.03                                                 | 20          | 0.00         | 0.00                                                                                  | 0.00             | -       |
| 6         | 198.8        | 0.80              | 0.80             | 0.06                                                 | 21          | 162.3        | 0.66                                                                                  | 0.66             | 0.08    |
| 7         | 92.71        | 0.37              | 0.37             | 0.21                                                 | 22          | 180.3        | 0.73                                                                                  | 0.73             | 0.05    |
| 8         | 139.5        | 0.56              | 0.56             | 0.01                                                 | 23          | 247.2        | 1.00                                                                                  | 1.00             | 0.01    |
| 9         | 0.00         | 0.00              | 0.00             | -                                                    | 24          | 201.3        | 0.81                                                                                  | 1.00             | 22.68   |
| 11        | 0.00         | 0.00              | -0.01            | -                                                    | 26          | 149.6        | 0.61                                                                                  | 0.61             | 0.00    |
| 12        | 227.5        | 0.92              | 0.92             | 0.08                                                 | 10* 17* 27* | 0.00         | 0.00                                                                                  | 0.00             | -       |
| 13        | 193.0        | 0.78              | 0.78             | 0.06                                                 |             |              |                                                                                       |                  |         |
| Constants |              |                   |                  | Variables                                            |             | Molecule     |                                                                                       |                  |         |
| a1        | -0.227       | a13               | 1.279            | t (min)                                              | 30          | 19.1097      | 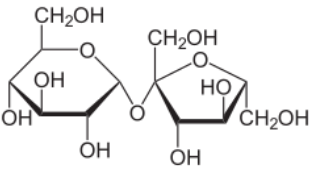 |                  |         |
| a2        | 0.525        | a14               | -0.176           |                                                      | 75          | 19.1097      |                                                                                       |                  |         |
| a3        | 0.769        | a15               | 1.037            |                                                      | 120         | 19.1097      |                                                                                       |                  |         |
| a4        | 1.057        | a16               | -0.308           | r                                                    | 0.5         | 0.1481       |                                                                                       |                  |         |
| a5        | 0.208        | a17               | 0.786            |                                                      | 1           | 0.2294       |                                                                                       |                  |         |
| a6        | 0.534        | a18               | 0.89             |                                                      | 2           | 0.8523       |                                                                                       |                  |         |
| a7        | 0.888        | a19               | 0.13             | e                                                    | 4           | 0.8462       |                                                                                       |                  |         |
| a8        | 0.408        | a20               | 0.649            |                                                      | 3.5         | 0.1914       |                                                                                       |                  |         |
| a9        | 0.297        | a21               | 0.856            |                                                      | 4.5         | 0.4625       |                                                                                       |                  |         |
| a10       | 0.949        | a22               | -1.338           | Coefficient of determination R <sup>2</sup><br>0.989 |             |              |                                                                                       |                  |         |
| a11       | 0.313        | a23               | 1.024            |                                                      |             |              |                                                                                       |                  |         |
| a12       | 0.892        | a24               | 1.027            |                                                      |             |              |                                                                                       |                  |         |

\*Central points

**Table S5.** Experimental results for the optimization of the polyphenols extraction process, parameters, constants, and the ANFIS model fit.

| Exp. | Polyphenol mg/L | Relative value | Estimation ANFIS | % Error | Exp. | Polyphenol mg/L | Relative value | Estimation ANFIS | % Error |
|------|-----------------|----------------|------------------|---------|------|-----------------|----------------|------------------|---------|
| 1    | 2785            | -0.49          | -0.49            | 0.16    | 15   | 4628            | -0.15          | -0.16            | 1.12    |
| 2    | 2735            | -0.50          | -0.53            | 5.11    | 16   | 6649            | 0.22           | 0.20             | 5.07    |
| 3    | 2535            | -0.54          | -0.51            | 5.73    | 18   | 4756            | -0.13          | -0.13            | 0.10    |
| 4    | 2656            | -0.51          | -0.51            | 0.49    | 19   | 5299            | -0.03          | -0.03            | 1.07    |
| 5    | 4164            | -0.24          | -0.24            | 0.10    | 20   | 3842            | -0.30          | -0.30            | 0.70    |

| 6         | 3356    | -0.39 | -0.39  | 0.89                                        | 21             | 7521    | 0.37                                                                                | 0.37  | 0.03  |
|-----------|---------|-------|--------|---------------------------------------------|----------------|---------|-------------------------------------------------------------------------------------|-------|-------|
| 7         | 5635    | 0.03  | 0.03   | 0.57                                        | 22             | 7356    | 0.34                                                                                | 0.34  | 0.06  |
| 8         | 6199    | 0.13  | 0.14   | 3.70                                        | 23             | 5399    | -0.01                                                                               | -0.01 | 1.86  |
| 9         | 7635    | 0.40  | 0.40   | 0.13                                        | 24             | 5371    | -0.02                                                                               | -0.02 | 0.98  |
| 11        | 7578    | 0.39  | 0.39   | 0.11                                        | 25             | 6849    | 0.25                                                                                | 0.25  | 0.04  |
| 12        | 6249    | 0.14  | 0.15   | 6.31                                        | 26             | 3506    | -0.36                                                                               | -0.36 | 0.24  |
| 13        | 6664    | 0.22  | 0.22   | 0.02                                        | 10* 17*<br>27* | 6799    | 0.24                                                                                | 0.16  | 33.62 |
| 14        | 6342    | 0.16  | 0.16   | 1.20                                        |                |         |                                                                                     |       |       |
| Constants |         |       |        | Variables                                   |                | Value L | Molecule                                                                            |       |       |
| a1        | 0.55    | a13   | 0.28   |                                             | 30             | 19.1097 | 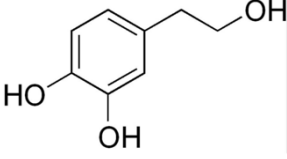 |       |       |
| a2        | -7.835  | a14   | 0.531  | t (min)                                     | 75             | 19.1097 |                                                                                     |       |       |
| a3        | -0.0332 | a15   | -0.218 |                                             | 120            | 19.1097 |                                                                                     |       |       |
| a4        | 0.242   | a16   | 0.061  |                                             | 0.5            | 0.0693  |                                                                                     |       |       |
| a5        | -0.576  | a17   | 0.462  | r                                           | 1              | 0.2178  |                                                                                     |       |       |
| a6        | -0.551  | a18   | 0.438  |                                             | 2              | 0.9186  |                                                                                     |       |       |
| a7        | -0.382  | a19   | -0.102 | e                                           | 4              | 0.5335  |                                                                                     |       |       |
| a8        | 0.166   | a20   | -0.248 |                                             | 3.5            | 0.4552  |                                                                                     |       |       |
| a9        | 0.272   | a21   | -0.4   | p                                           | 4.5            | 0.2287  |                                                                                     |       |       |
| a10       | -0.454  | a22   | 0.321  | Coefficient of determination R <sup>2</sup> |                |         |                                                                                     |       |       |
| a11       | -0.002  | a23   | 0.047  |                                             | 0.999          |         |                                                                                     |       |       |
| a12       | 0.0006  | a24   | -0.072 |                                             |                |         |                                                                                     |       |       |

\*Central points

An example of the Neuro-fuzzy model designed for INOSITOL.

function y=INOSITOL3222(t,r,e,p)

a1=0.309;  
a2=0.210;  
a3=-0.139;  
a4=0.409;  
a5=-0.311;  
a6=-0.071;  
a7=0.665;  
a8=-0.003;  
a9=-0.164;  
a10=-0.326;  
a11=-0.160;  
a12=0.131;  
a13=-0.032;  
a14=-0.013;  
a15=0.040;  
a16=0.039;  
a17=-0.058;  
a18=0.062;  
a19=0.023;  
a20=0.059;  
a21=0.056;

```

a22=0.074;
a23=0.194;
a24=-0.047;
c11=29.999;
an11=19.109;
c12=75;
an12=19.109;
c13=120;
an13=19.109;
c21=0.528;
an21=0.231;
c22=1.056;
an22=0.133;
c31=1.955;
an31=0.806;
c32=3.962;
an32=0.878;
c41=3.394;
an41=0.274;
c42=4.446;
an42=0.459;
f11=exp(-.5*((t-c11)./an11).^2);
f12=exp(-.5*((t-c12)./an12).^2);
f13=exp(-.5*((t-c13)./an13).^2);
f21=exp(-.5*((r-c21)./an21).^2);
f22=exp(-.5*((r-c22)./an22).^2);
f31=exp(-.5*((e-c31)./an31).^2);
f32=exp(-.5*((e-c32)./an32).^2);
f41=exp(-.5*((p-c41)./an41).^2);
f42=exp(-.5*((p-c42)./an42).^2);
y=(a1.*f11.*f21.*f31.*f41+a2.*f11.*f21.*f31.*f42+a3.*f11.*f21.*f32.*f41+a4.*f11.*f21.*f32.*f42+a5.*f11.*f22.*f31.*f41+a6.*f11.*f22.*f31.*f42+a7.*f11.*f22.*f32.*f41+a8.*f11.*f22.*f32.*f42+a9.*f12.*f21.*f31.*f41+a10.*f12.*f21.*f31.*f42+a11.*f12.*f21.*f32.*f41+a12.*f12.*f21.*f32.*f42+a13.*f12.*f22.*f31.*f41+a14.*f12.*f22.*f31.*f42+a15.*f12.*f22.*f32.*f41+a16.*f12.*f22.*f32.*f42+a17.*f13.*f21.*f31.*f41+a18.*f13.*f21.*f31.*f42+a19.*f13.*f21.*f32.*f41+a20.*f13.*f21.*f32.*f42+a21.*f13.*f22.*f31.*f41+a22.*f13.*f22.*f31.*f42+a23.*f13.*f22.*f32.*f41+a24.*f13.*f22.*f32.*f42)./(f11.*f21.*f31.*f41+f11.*f21.*f31.*f42+f11.*f21.*f32.*f41+f11.*f21.*f32.*f42+f11.*f22.*f31.*f41+f11.*f22.*f31.*f42+f11.*f22.*f32.*f41+f11.*f22.*f32.*f42+f12.*f21.*f31.*f41+f12.*f21.*f31.*f42+f12.*f21.*f32.*f41+f12.*f21.*f32.*f42+f12.*f22.*f31.*f41+f12.*f22.*f31.*f42+f12.*f22.*f32.*f41+f12.*f22.*f32.*f42+f13.*f21.*f31.*f41+f13.*f21.*f31.*f42+f13.*f21.*f32.*f41+f13.*f21.*f32.*f42+f13.*f22.*f31.*f41+f13.*f22.*f31.*f42+f13.*f22.*f32.*f41+f13.*f22.*f32.*f42);
end

```
